# Supplementary material for: Impact of Early Rhythmic Training on Language Acquisition and Electrophysiological Functioning Underlying Auditory Processing: Feasibility and Preliminary Findings in Typically Developing Infants
Source: MDPI journal article supplement (doi:10.3390/brainsci11111546), 2021-11-21
Supplement: s1 [file s1]

**Table S1.** Mean (Standard Deviation) and group comparison for parents' BMEQ scales.

| <b>Mothers' BMEQ scores</b>          |             |             |          |          |
|--------------------------------------|-------------|-------------|----------|----------|
|                                      | <b>RTr+</b> | <b>RTr–</b> | <b>t</b> | <b>p</b> |
| <b>Commitment to music</b>           | 1.96 (0.67) | 2.03 (0.39) | 0.267    | 0.792    |
| <b>Innovative musical aptitude</b>   | 1.83 (0.80) | 1.78 (0.90) | -0.153   | 0.880    |
| <b>Social uplift</b>                 | 3.50 (0.65) | 3.16 (0.85) | -1.085   | 0.290    |
| <b>Affective reactions</b>           | 4.09 (0.39) | 4.11 (0.49) | 0.095    | 0.925    |
| <b>Positive psychotropic effects</b> | 3.03 (0.59) | 2.98 (0.52) | -0.233   | 0.818    |
| <b>Reactive musical behavior</b>     | 3.69 (0.68) | 3.57 (0.82) | -0.408   | 0.687    |
| <b>Fathers' BMEQ scores</b>          |             |             |          |          |
|                                      | <b>RTr+</b> | <b>RTr–</b> | <b>t</b> | <b>p</b> |
| <b>Commitment to music</b>           | 2.45 (0.73) | 2.09 (0.58) | -1.310   | 0.204    |
| <b>Innovative musical aptitude</b>   | 2.09 (0.63) | 2.32 (1.02) | 0.654    | 0.520    |
| <b>Social uplift</b>                 | 2.83 (0.69) | 2.73 (0.59) | -0.394   | 0.697    |
| <b>Affective reactions</b>           | 4.04 (0.39) | 4.18 (0.37) | 0.879    | 0.389    |
| <b>Positive psychotropic effects</b> | 3.11 (0.56) | 3.01 (0.73) | -0.365   | 0.719    |
| <b>Reactive musical behavior</b>     | 3.40 (0.58) | 3.49 (0.84) | 0.324    | 0.749    |

**Table S2.** Mean (Standard Deviation) and group comparison for pre-training ERP indices considered in the study.

|                                          | <b>RTr+</b>                        | <b>RTr–</b>                     |          |          |
|------------------------------------------|------------------------------------|---------------------------------|----------|----------|
|                                          | <b>subsample<br/>with ERP data</b> | <b>sample with<br/>ERP data</b> | <b>t</b> | <b>p</b> |
|                                          | <b>(N = 11)</b>                    | <b>(N = 14)</b>                 |          |          |
| <b>N2* DEVD Left Amplitude</b>           | -1.20 (1.03)                       | -1.18 (1.94)                    | 0.020    | 0.985    |
| <b>N2* DEVD Right Amplitude</b>          | -0.83 (2.04)                       | -0.38 (2.83)                    | 0.448    | 0.658    |
| <b>N2* DEVD Left Latency</b>             | 345.21 (19.73)                     | 328.48 (21.03)                  | -2.029   | 0.054    |
| <b>N2* DEVD Right Latency</b>            | 331.60 (26.21)                     | 329.37 (19.76)                  | -0.243   | 0.810    |
| <b>MMR DEVF Left Mean<br/>Amplitude</b>  | 5.23 (2.59)                        | 3.02 (2.75)                     | -2.045   | 0.052    |
| <b>MMR DEVF Right Mean<br/>Amplitude</b> | 3.46 (3.81)                        | 3.94 (2.73)                     | 0.365    | 0.718    |
| <b>MMR DEVD Left Mean<br/>Amplitude</b>  | 2.87 (2.50)                        | 3.51 (2.50)                     | 0.638    | 0.530    |
| <b>MMR DVD Right Mean<br/>Amplitude</b>  | 1.95 (2.01)                        | 3.10 (3.18)                     | 1.044    | 0.307    |
